# Supplementary material
Source: PubMed Central journal article supplement (PMC7522777)
Supplement: jamapediatr-e203973-s001.pdf [file jamapediatr-e203973-s001.pdf]

## Supplementary Online Content

Wisk LE, Peltz A, Galbraith AA. Changes in health care–related financial burden for US families with children associated with the Affordable Care Act. *JAMA Pediatr*. Published online September 28, 2020. doi:10.1001/jamapediatrics.2020.3973

**eTable 1.** Characteristics of Marketplace Insurance Plans Among Families With Children

**eFigure 1.** Time Trends in Financial Burden by ACA Eligibility Group

**eTable 2.** Unadjusted and Adjusted Changes in Premium Unaffordability Index and Multivariable Difference-in-Differences Estimator

**eFigure 2.** Predictive Margins for Family Premium Unaffordability Index Pre- and Post-ACA

**eTable 3.** Sensitivity Analysis for Changes in Financial Burden Using an Alternative Pre-Period

**eTable 4.** Sensitivity Analysis for Changes in Financial Burden Using Refined ACA Exposure Groups

This supplementary material has been provided by the authors to give readers additional information about their work.

**eTable 1. Characteristics of Marketplace Insurance Plans among Families with Children**

|                                                 | <b>Total N<br/>(unweighted)</b> | <b>Total %<br/>(weighted)</b> |
|-------------------------------------------------|---------------------------------|-------------------------------|
| <b>Total Person-Plan-Years</b>                  | 2,271                           | 100%                          |
| <b>Coverage Type</b>                            |                                 |                               |
| Single                                          | 867                             | 34.7%                         |
| Family                                          | 1,404                           | 65.3%                         |
| <b>Plan Metal Level <sup>a</sup></b>            |                                 |                               |
| Platinum                                        | 95                              | 8.1%                          |
| Gold                                            | 62                              | 7.4%                          |
| Silver                                          | 558                             | 52.0%                         |
| Bronze                                          | 241                             | 19.9%                         |
| Catastrophic                                    | 43                              | 2.7%                          |
| Something else                                  | 99                              | 9.8%                          |
| Don't know / Unknown                            | 893                             | --                            |
| <b>Plan Premium</b>                             |                                 |                               |
| Any (>\$0)                                      | 1,451                           | 65.1%                         |
| None (\$0)                                      | 820                             | 34.9%                         |
| <b>Premium is Subsidized</b>                    |                                 |                               |
| Yes                                             | 1,913                           | 81.4%                         |
| No                                              | 291                             | 18.6%                         |
| Don't know / Unknown                            | 67                              | --                            |
| <b>Monthly Premium (2017 US\$) <sup>b</sup></b> |                                 |                               |
| Mean                                            |                                 | \$349.37                      |
| Median                                          |                                 | \$244.11                      |
| <b>Annual Deductible</b>                        |                                 |                               |
| No deductible                                   | 409                             | 24.1%                         |
| < \$1350 (Single) / \$2700 (Family)             | 555                             | 30.6%                         |
| ≥\$1350 (Single) / \$2700 (Family)              | 559                             | 45.3%                         |
| Don't know / Unknown                            | 748                             | --                            |

Unit of analysis is the person-plan-year (one observation for each year of Marketplace coverage reported per person); N=2,271 person-plan-years among members of families with children with plans where actuarial characteristics were reported (Source: MEPS Person Round Plan Files from 2014 to 2017).

- a. Variable available for 2015 to 2017 only. All health plans offered through the Marketplace must meet the requirements of “qualified health plans” but plans vary based on actuarial value (the percent of health care costs paid by the carrier on average), described as the metal tier (Bronze, Silver, Gold, Platinum). Bronze plans have the lowest actuarial value with higher deductibles and other cost sharing, while Platinum plans have the highest actuarial value and lowest deductibles and cost sharing.
- b. Premium amount among plans with non-zero premiums.

**eFigure 1. Time Trends in Financial Burden by ACA Eligibility Group**

**A. High Out-of-Pocket Burden.** Figure shows unadjusted prevalence (points) and annual trends (lines, with 95% confidence intervals) for the probability of high out-of-pocket (OOP) financial burden by Affordable Care Act (ACA) eligibility groups [Medicaid-eligible: ≤138% federal poverty level (FPL); Cost-sharing reduction (CSR) eligible: 139-250% FPL; Advanced Premium Tax Credit (APTC) eligible: 251-400% FPL; No assistance: >400% FPL]. Unadjusted annual trends were estimated separately for the pre- and post-ACA periods (solid lines) and the pre-ACA trend was projected forward (dashed line).

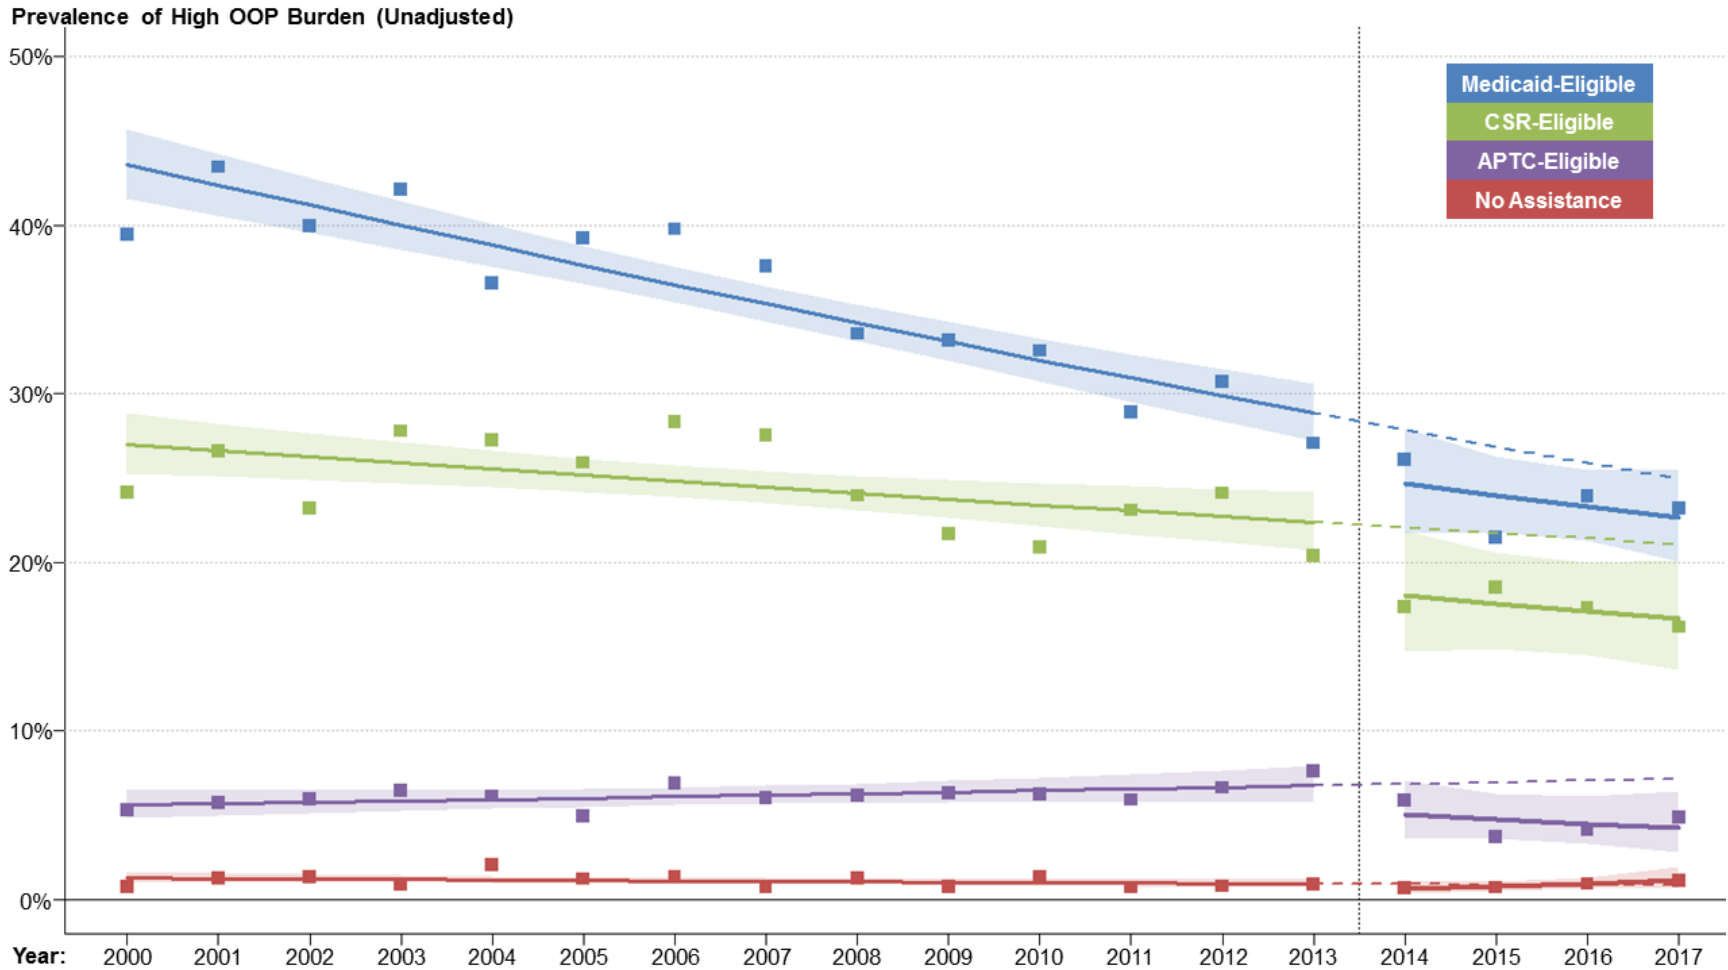

**B. Extreme Out-of-Pocket Burden.** Figure shows unadjusted prevalence (points) and annual trends (lines, with 95% confidence intervals) for the probability of extreme out-of-pocket (OOP) financial burden by Affordable Care Act (ACA) eligibility groups [Medicaid-eligible:  $\leq 138\%$  federal poverty level (FPL); Cost-sharing reduction (CSR) eligible: 139-250% FPL; Advanced Premium Tax Credit (APTC) eligible: 251-400% FPL; No assistance:  $>400\%$  FPL]. Unadjusted annual trends were estimated separately for the pre- and post-ACA periods (solid lines) and the pre-ACA trend was projected forward (dashed line).

**Prevalence of Extreme OOP Burden (Unadjusted)**

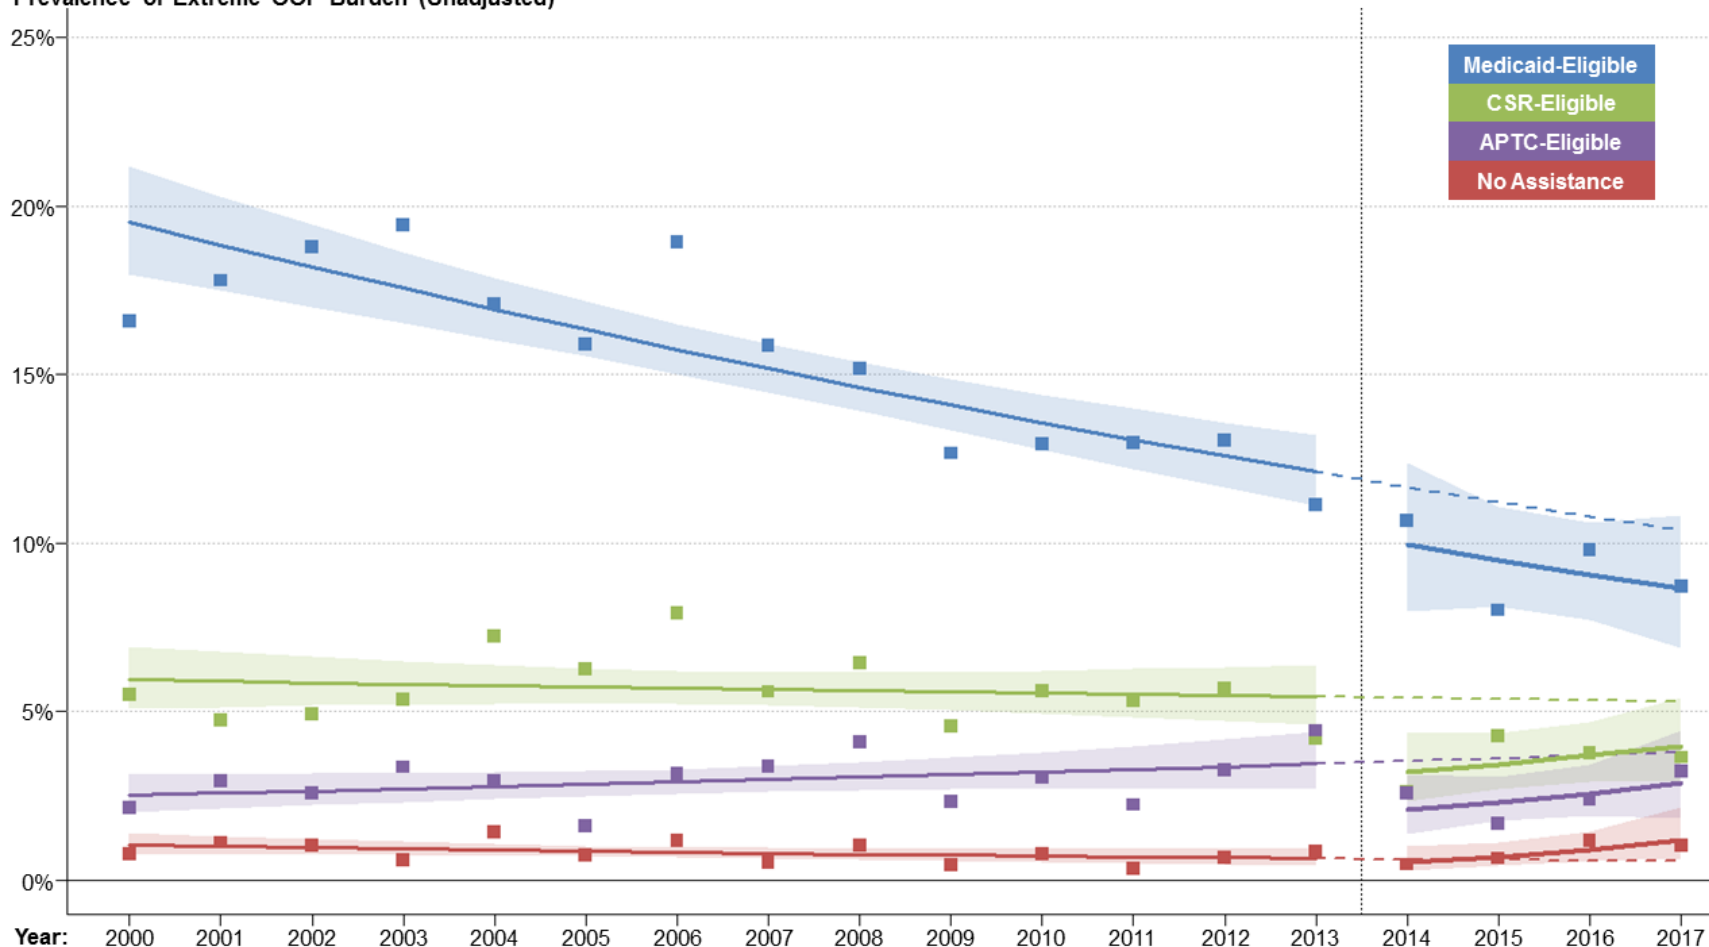

**C. Premium Burden.** Figure shows unadjusted prevalence (points) and annual trends (lines, with 95% confidence intervals) for the probability of premium burden by Affordable Care Act (ACA) eligibility groups [Medicaid-eligible:  $\leq 138\%$  federal poverty level (FPL); Cost-sharing reduction (CSR) eligible: 139-250% FPL; Advanced Premium Tax Credit (APTC) eligible: 251-400% FPL; No assistance:  $>400\%$  FPL] among families who reported any private coverage. Unadjusted annual trends were estimated separately for the pre- and post-ACA periods (solid lines) and the pre-ACA trend was projected forward (dashed line).

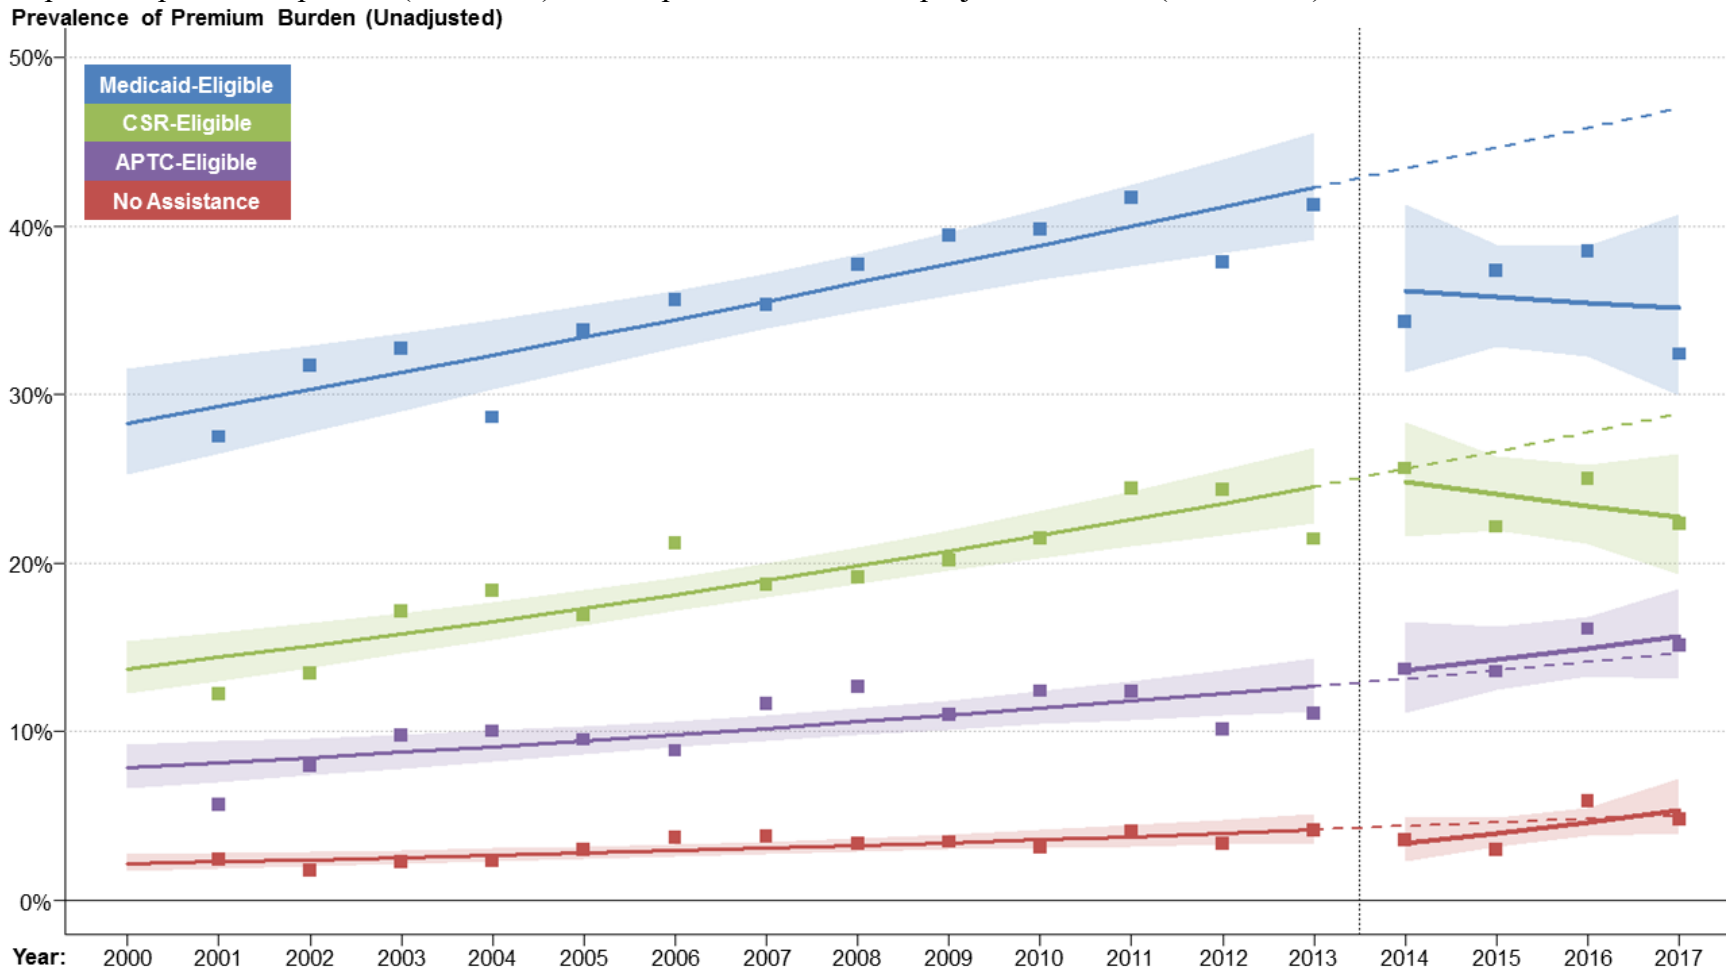

**D. Premium Unaffordability Index.** Figure shows unadjusted mean (points) and annual trends (lines, with 95% confidence intervals) for the premium unaffordability index by Affordable Care Act (ACA) eligibility groups [Medicaid-eligible:  $\leq 138\%$  federal poverty level (FPL); Cost-sharing reduction (CSR) eligible: 139-250% FPL; Advanced Premium Tax Credit (APTC) eligible: 251-400% FPL; No assistance:  $>400\%$  FPL] among families who reported any private coverage. Unadjusted annual trends were estimated separately for the pre- and post-ACA periods (solid lines) and the pre-ACA trend was projected forward (dashed line).

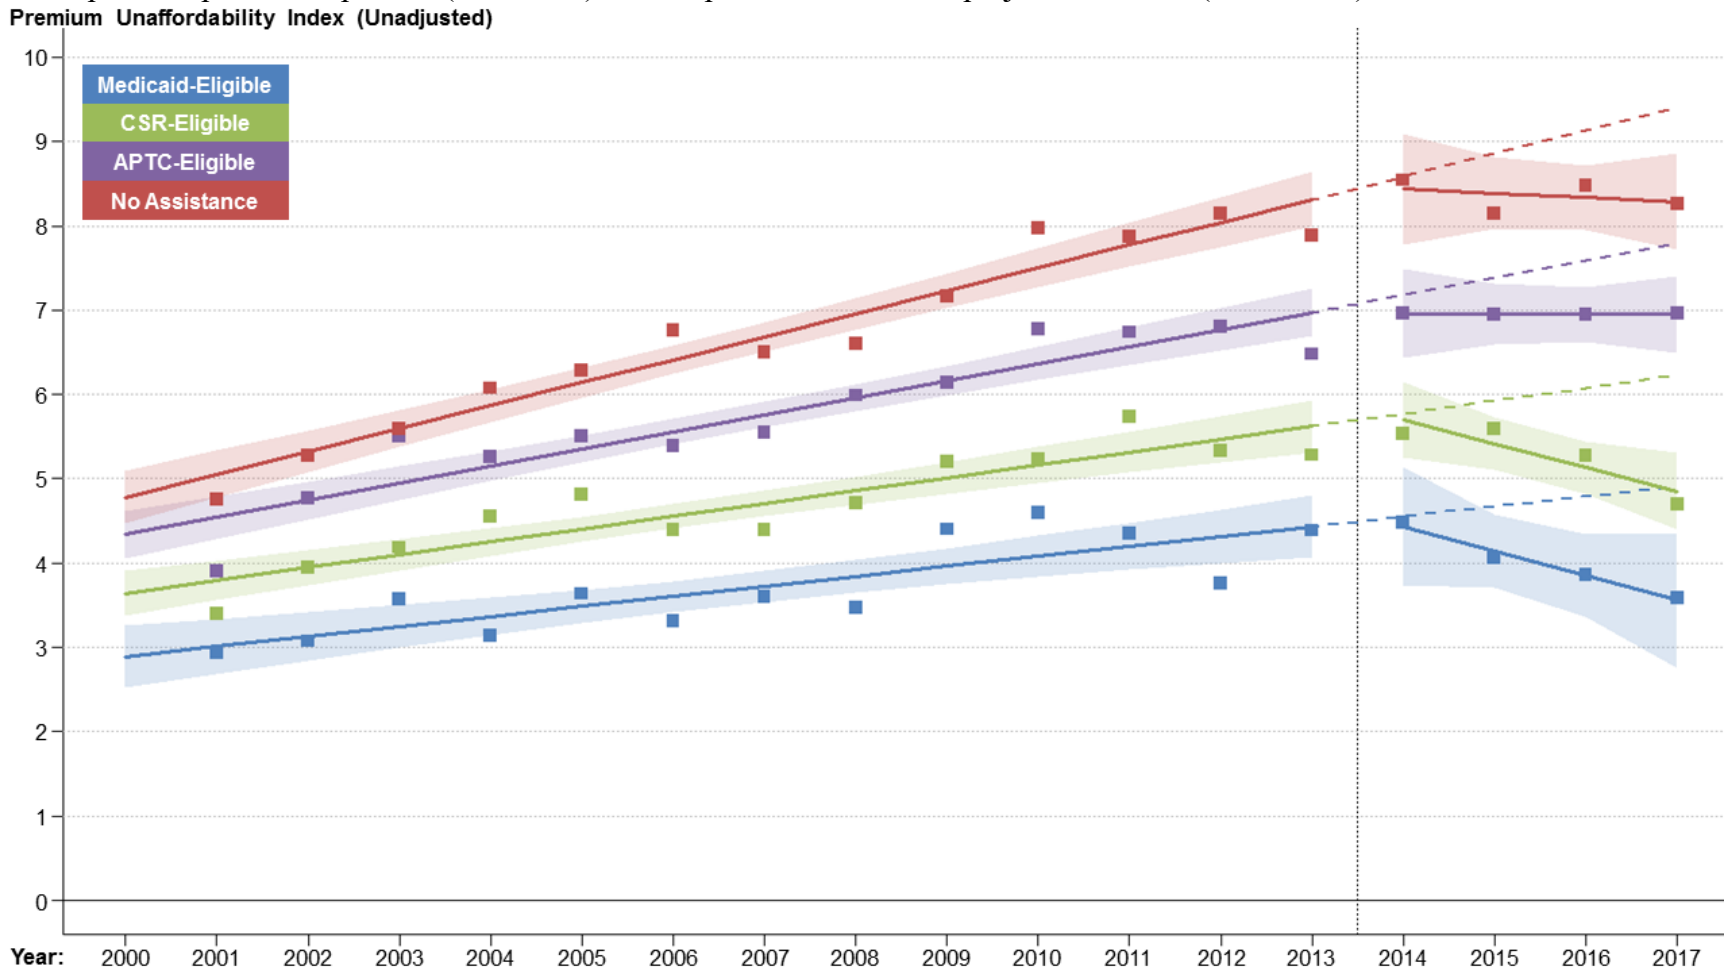

**eTable 2. Unadjusted and Adjusted Changes in Premium Unaffordability Index and Multivariable Difference-in-Differences Estimator**

| Premium Unaffordability Index | Unadjusted Post vs Pre |          |            |               | Adjusted Post vs Pre |               | Difference-in-Differences |                |
|-------------------------------|------------------------|----------|------------|---------------|----------------------|---------------|---------------------------|----------------|
|                               | Pre-ACA                | Post-ACA | Difference | 95% CI        | Difference           | 95% CI        | Est                       | 95% CI         |
| <i>Overall</i>                | 5.70                   | 6.95     | 1.25       | (1.03, 1.47)  | -                    | -             | -                         | -              |
| Medicaid-Eligible             | 3.72                   | 4.02     | 0.29       | (-0.15, 0.73) | 0.32                 | (-0.10, 0.74) | -1.32                     | (-1.90, -0.74) |
| CSR-Eligible                  | 4.70                   | 5.28     | 0.59       | (0.26, 0.92)  | 0.56                 | (0.24, 0.89)  | -1.08                     | (-1.60, -0.57) |
| APTC-Eligible                 | 5.72                   | 6.95     | 1.23       | (0.90, 1.57)  | 1.08                 | (0.75, 1.40)  | -0.57                     | (-1.06, -0.08) |
| No Assistance                 | 6.66                   | 8.36     | 1.69       | (1.29, 2.09)  | 1.64                 | (1.25, 2.04)  | <i>Reference</i>          |                |

ACA – Affordable Care Act; CSR – Cost-Sharing Reductions; APTC – Advanced Premium Tax Credits.

Overall and ACA eligibility group-specific estimates and 95% confidence intervals (CI) for the unadjusted and adjusted post-ACA (2014-2017) vs pre-ACA (2001-2013) change in premium unaffordability index among families who reported any private coverage. Premium unaffordability index is determined by dividing a family’s total annual premium contributions by U.S. median household income for a given year; higher values indicate a greater degree of premium burden as the index this represents the percentage of an ‘average’ family’s income that would be devoted to health insurance premiums. Adjusted post vs pre change were estimated from a fully adjusted multivariable model including a difference-in-differences estimator and controlling for number of children in the family, number of adults in the family, infants in the family, seniors (ages ≥65) in the family, interview language, sex of the family respondent, race/ethnicity of the family respondent, marital status of the family respondent, highest educational attainment within the family, region of residence, family members in fair/poor physical health, and family members in fair/poor mental health. The difference-in-differences estimator shows the adjusted relative change in the unaffordability index for each eligibility group compared to families who were not eligible for assistance.

**eFigure 2. Predictive Margins for Family Premium Unaffordability Index Pre- and Post-ACA**

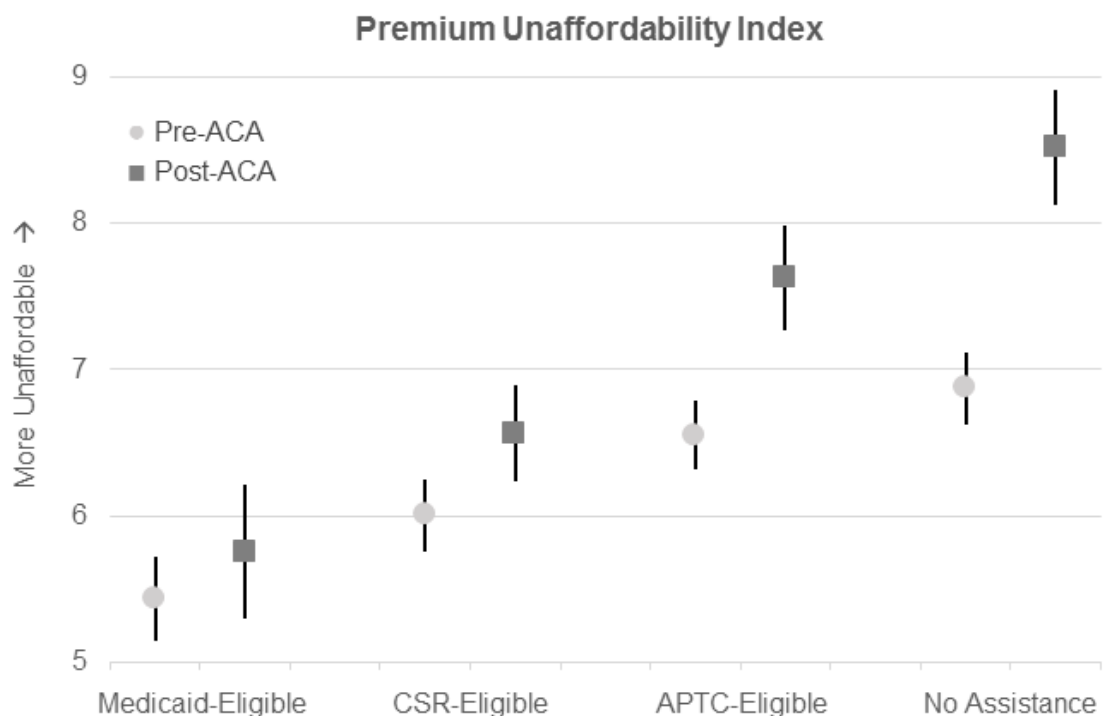

Figure shows pre-ACA (light circle) vs post-ACA (dark square) adjusted marginal mean premium unaffordability index (with 95% confidence intervals) by ACA eligibility group, output from fully adjusted multivariable models including a difference-in-differences estimator and controlling for number of children in the family, number of adults in the family, infants in the family, seniors (ages  $\geq 65$ ) in the family, interview language, sex of the family respondent, race/ethnicity of the family respondent, marital status of the family respondent, highest educational attainment within the family, region of residence, family members in fair/poor physical health, and family members in fair/poor mental health. ACA – Affordable Care Act; CSR – Cost-Sharing Reductions; APTC – Advanced Premium Tax Credits.



**eTable 3. Sensitivity Analysis for Changes in Financial Burden using an Alternative Pre-Period**

|                                | Unadjusted Post vs Pre |          |            |                  | Adjusted Post vs Pre |                  | Difference-in-Differences |                  |
|--------------------------------|------------------------|----------|------------|------------------|----------------------|------------------|---------------------------|------------------|
|                                | Pre-ACA                | Post-ACA | Difference | 95% CI           | Difference           | 95% CI           | Est                       | 95% CI           |
| <b>High OOP Burden</b>         |                        |          |            |                  |                      |                  |                           |                  |
| Medicaid-Eligible              | 38.3%                  | 23.7%    | -14.6%     | (-16.7%, -12.5%) | -14.4%               | (-16.3%, -12.4%) | -14.1%                    | (-16.1%, -12.1%) |
| CSR-Eligible                   | 25.6%                  | 17.3%    | -8.3%      | (-10.2%, -6.3%)  | -8.2%                | (-10.1%, -6.3%)  | -7.9%                     | (-9.9%, -6.0%)   |
| APTC-Eligible                  | 6.0%                   | 4.6%     | -1.3%      | (-2.4%, -0.3%)   | -1.4%                | (-2.5%, -0.2%)   | -1.1%                     | (-2.2%, 0.1%)    |
| No Assistance                  | 1.2%                   | 0.9%     | -0.3%      | (-0.7%, 0.1%)    | -0.3%                | (-0.8%, 0.2%)    | <i>Reference</i>          |                  |
|                                |                        |          |            |                  |                      |                  |                           |                  |
| <b>Extreme OOP Burden</b>      |                        |          |            |                  |                      |                  |                           |                  |
| Medicaid-Eligible              | 16.7%                  | 9.3%     | -7.4%      | (-8.8%, -6.0%)   | -7.3%                | (-8.6%, -6.0%)   | -7.2%                     | (-8.6%, -5.9%)   |
| CSR-Eligible                   | 5.9%                   | 3.6%     | -2.3%      | (-3.2%, -1.4%)   | -2.3%                | (-3.2%, -1.4%)   | -2.2%                     | (-3.2%, -1.2%)   |
| APTC-Eligible                  | 2.9%                   | 2.4%     | -0.4%      | (-1.2%, 0.4%)    | -0.5%                | (-1.3%, 0.3%)    | -0.4%                     | (-1.3%, 0.5%)    |
| No Assistance                  | 0.9%                   | 0.8%     | 0.0%       | (-0.5%, 0.4%)    | -0.1%                | (-0.5%, 0.4%)    | <i>Reference</i>          |                  |
|                                |                        |          |            |                  |                      |                  |                           |                  |
| <b>Premium Burden</b>          |                        |          |            |                  |                      |                  |                           |                  |
| Medicaid-Eligible              | 33.6%                  | 35.6%    | 2.1%       | (-1.4%, 5.6%)    | 2.7%                 | (-0.7%, 6.1%)    | 1.2%                      | (-2.3%, 4.7%)    |
| CSR-Eligible                   | 17.4%                  | 23.8%    | 6.3%       | (3.8%, 8.8%)     | 6.7%                 | (4.1%, 9.2%)     | 5.2%                      | (2.6%, 7.7%)     |
| APTC-Eligible                  | 9.7%                   | 14.6%    | 4.9%       | (3.0%, 6.8%)     | 5.1%                 | (3.1%, 7.0%)     | 3.6%                      | (1.6%, 5.6%)     |
| No Assistance                  | 2.9%                   | 4.3%     | 1.4%       | (0.6%, 2.3%)     | 1.5%                 | (0.6%, 2.3%)     | <i>Reference</i>          |                  |
|                                |                        |          |            |                  |                      |                  |                           |                  |
| <b>Premium Unaffordability</b> |                        |          |            |                  |                      |                  |                           |                  |
| Medicaid-Eligible              | 3.47                   | 4.02     | 0.55       | (0.09, 1.01)     | 0.57                 | (0.13, 1.01)     | -1.63                     | (-2.23, -1.03)   |
| CSR-Eligible                   | 4.39                   | 5.28     | 0.89       | (0.56, 1.22)     | 0.86                 | (0.53, 1.18)     | -1.35                     | (-1.86, -0.84)   |
| APTC-Eligible                  | 5.34                   | 6.95     | 1.62       | (1.26, 1.98)     | 1.45                 | (1.10, 1.80)     | -0.75                     | (-1.24, -0.26)   |
| No Assistance                  | 6.10                   | 8.36     | 2.26       | (1.84, 2.68)     | 2.20                 | (1.80, 2.61)     | <i>Reference</i>          |                  |

ACA – Affordable Care Act; CSR – Cost-Sharing Reductions; APTC – Advanced Premium Tax Credits; OOP – Out-of-Pocket. Estimates and 95% confidence intervals (CI) for the unadjusted and adjusted post-ACA (2014-2017) vs pre-ACA (2000-2009) change in financial burden measures are presented by group; adjusted post vs pre change were estimated from fully adjusted multivariable models including a difference-in-differences estimator and controlling for number of children in the family, number of adults in the family, infants in the family, seniors (ages ≥65) in the family, interview language, sex of the family respondent, race/ethnicity of the family respondent, marital status of the family respondent, highest educational attainment within the family, region of residence, family members in fair/poor physical health, and family members in fair/poor mental health. The difference-in-differences estimator shows the adjusted relative change in burden for each eligibility group compared to families who were not eligible for assistance. Premiums are among families who reported any private coverage from 2001 on (N=57,442).

**eTable 4. Sensitivity Analysis for Changes in Financial Burden using Refined ACA Exposure Groups**

|                                     | Unadjusted Post- vs Pre-ACA |       |        |                 | Adjusted Post- vs Pre-ACA |                 | Difference-in-Differences |                 |
|-------------------------------------|-----------------------------|-------|--------|-----------------|---------------------------|-----------------|---------------------------|-----------------|
|                                     | Pre                         | Post  | Diff   | 95% CI          | Diff                      | 95% CI          | Est                       | 95% CI          |
| <b>High OOP Burden</b>              |                             |       |        |                 |                           |                 |                           |                 |
| Medicaid-Eligible w/ Medicaid/CHIP  | 31.5%                       | 21.5% | -10.0% | (-11.9%, -8.1%) | -9.8%                     | (-11.6%, -8.1%) | -9.8%                     | (-11.6%, -8.0%) |
| Medicaid-Eligible w/o Medicaid/CHIP | 54.9%                       | 45.7% | -9.2%  | (-16.0%, -2.4%) | -9.1%                     | (-15.9%, -2.3%) | -9.1%                     | (-15.9%, -2.3%) |
| CSR-Eligible w/o ESI offered        | 29.0%                       | 19.3% | -9.7%  | (-13.7%, -5.8%) | -10.0%                    | (-13.7%, -6.4%) | -10.0%                    | (-13.7%, -6.3%) |
| CSR-Eligible w/ ESI offered         | 23.3%                       | 16.7% | -6.6%  | (-8.6%, -4.5%)  | -6.0%                     | (-8.1%, -4.0%)  | -6.0%                     | (-8.1%, -3.9%)  |
| APTC-Eligible w/o ESI offered       | 10.8%                       | 7.4%  | -3.4%  | (-7.3%, 0.6%)   | -3.2%                     | (-6.9%, 0.6%)   | -3.1%                     | (-6.9%, 0.6%)   |
| APTC-Eligible w/ ESI offered        | 5.6%                        | 4.3%  | -1.3%  | (-2.3%, -0.3%)  | -1.1%                     | (-2.2%, 0.1%)   | -1.0%                     | (-2.2%, 0.1%)   |
| No Assistance w/o ESI offered       | 2.5%                        | 1.5%  | -1.0%  | (-2.7%, 0.7%)   | -1.4%                     | (-3.5%, 0.6%)   | -1.4%                     | (-3.5%, 0.7%)   |
| No Assistance w/ ESI offered        | 1.0%                        | 0.8%  | -0.2%  | (-0.5%, 0.2%)   | 0.0%                      | (-0.5%, 0.4%)   | <i>Reference</i>          |                 |
| <b>Extreme OOP Burden</b>           |                             |       |        |                 |                           |                 |                           |                 |
| Medicaid-Eligible w/ Medicaid/CHIP  | 13.0%                       | 8.2%  | -4.8%  | (-6.0%, -3.6%)  | -4.8%                     | (-5.9%, -3.6%)  | -4.9%                     | (-6.2%, -3.7%)  |
| Medicaid-Eligible w/o Medicaid/CHIP | 26.6%                       | 20.5% | -6.1%  | (-12.4%, 0.2%)  | -6.0%                     | (-12.3%, 0.2%)  | -6.2%                     | (-12.5%, 0.1%)  |
| CSR-Eligible w/o ESI offered        | 8.3%                        | 5.0%  | -3.3%  | (-5.3%, -1.3%)  | -3.4%                     | (-5.4%, -1.4%)  | -3.6%                     | (-5.6%, -1.5%)  |
| CSR-Eligible w/ ESI offered         | 4.9%                        | 3.1%  | -1.8%  | (-2.7%, -0.9%)  | -1.6%                     | (-2.5%, -0.7%)  | -1.7%                     | (-2.8%, -0.7%)  |
| APTC-Eligible w/o ESI offered       | 5.6%                        | 3.3%  | -2.3%  | (-5.1%, 0.4%)   | -2.3%                     | (-5.0%, 0.4%)   | -2.4%                     | (-5.1%, 0.3%)   |
| APTC-Eligible w/ ESI offered        | 2.6%                        | 2.3%  | -0.3%  | (-1.0%, 0.5%)   | -0.3%                     | (-1.0%, 0.5%)   | -0.4%                     | (-1.3%, 0.5%)   |
| No Assistance w/o ESI offered       | 2.1%                        | 0.9%  | -1.1%  | (-2.6%, 0.3%)   | -1.3%                     | (-2.9%, 0.2%)   | -1.5%                     | (-3.1%, 0.1%)   |
| No Assistance w/ ESI offered        | 0.7%                        | 0.8%  | 0.1%   | (-0.3%, 0.5%)   | 0.1%                      | (-0.3%, 0.6%)   | <i>Reference</i>          |                 |
| <b>Premium Burden</b>               |                             |       |        |                 |                           |                 |                           |                 |
| Medicaid-Eligible w/ Medicaid/CHIP  | 28.0%                       | 29.4% | 1.3%   | (-2.3%, 5.0%)   | 1.7%                      | (-1.8%, 5.3%)   | 0.6%                      | (-3.1%, 4.3%)   |
| Medicaid-Eligible w/o Medicaid/CHIP | 50.4%                       | 60.0% | 9.5%   | (2.3%, 16.8%)   | 9.2%                      | (2.0%, 16.3%)   | 8.1%                      | (0.9%, 15.2%)   |
| CSR-Eligible w/o ESI offered        | 30.2%                       | 27.0% | -3.2%  | (-11.1%, 4.7%)  | -3.3%                     | (-10.9%, 4.4%)  | -4.4%                     | (-12.1%, 3.3%)  |
| CSR-Eligible w/ ESI offered         | 18.1%                       | 23.4% | 5.3%   | (2.7%, 7.9%)    | 5.7%                      | (3.1%, 8.3%)    | 4.6%                      | (2.0%, 7.2%)    |
| APTC-Eligible w/o ESI offered       | 23.2%                       | 25.9% | 2.7%   | (-7.2%, 12.6%)  | 3.4%                      | (-6.3%, 13.1%)  | 2.3%                      | (-7.5%, 12.1%)  |
| APTC-Eligible w/ ESI offered        | 9.5%                        | 13.8% | 4.3%   | (2.5%, 6.1%)    | 4.5%                      | (2.6%, 6.3%)    | 3.4%                      | (1.4%, 5.3%)    |
| No Assistance w/o ESI offered       | 10.3%                       | 14.2% | 3.9%   | (-3.7%, 11.6%)  | 3.9%                      | (-3.7%, 11.5%)  | 2.8%                      | (-4.9%, 10.5%)  |
| No Assistance w/ ESI offered        | 2.8%                        | 3.9%  | 1.1%   | (0.2%, 1.9%)    | 1.1%                      | (0.3%, 1.9%)    | <i>Reference</i>          |                 |

|                                     | Unadjusted Post- vs Pre-ACA |       |       |               | Adjusted Post- vs Pre-ACA |               | Difference-in-Differences |                |
|-------------------------------------|-----------------------------|-------|-------|---------------|---------------------------|---------------|---------------------------|----------------|
|                                     | Pre                         | Post  | Diff  | 95% CI        | Diff                      | 95% CI        | Est                       | 95% CI         |
| <b>Premium Unaffordability</b>      |                             |       |       |               |                           |               |                           |                |
| Medicaid-Eligible w/ Medicaid/CHIP  | 2.83                        | 3.31  | 0.48  | (0.04, 0.91)  | 0.46                      | (0.03, 0.89)  | -1.15                     | (-1.72, -0.58) |
| Medicaid-Eligible w/o Medicaid/CHIP | 5.46                        | 6.75  | 1.29  | (-0.00, 2.58) | 1.10                      | (-0.13, 2.34) | -0.51                     | (-1.79, 0.77)  |
| CSR-Eligible w/o ESI offered        | 5.80                        | 5.33  | -0.48 | (-1.70, 0.75) | -0.62                     | (-1.80, 0.56) | -2.24                     | (-3.48, -0.99) |
| CSR-Eligible w/ ESI offered         | 4.59                        | 5.28  | 0.69  | (0.35, 1.03)  | 0.66                      | (0.32, 1.00)  | -0.95                     | (-1.46, -0.44) |
| APTC-Eligible w/o ESI offered       | 7.75                        | 8.45  | 0.71  | (-1.40, 2.81) | 0.51                      | (-1.47, 2.48) | -1.11                     | (-3.12, 0.91)  |
| APTC-Eligible w/ ESI offered        | 5.61                        | 6.85  | 1.24  | (0.91, 1.57)  | 1.08                      | (0.76, 1.40)  | -0.53                     | (-1.03, -0.03) |
| No Assistance w/o ESI offered       | 10.67                       | 12.80 | 2.13  | (-0.44, 4.71) | 2.08                      | (-0.45, 4.61) | 0.47                      | (-2.10, 3.04)  |
| No Assistance w/ ESI offered        | 6.49                        | 8.15  | 1.66  | (1.26, 2.06)  | 1.61                      | (1.23, 2.00)  | <i>Reference</i>          |                |

ACA – Affordable Care Act; CSR – Cost-Sharing Reductions; APTC – Advanced Premium Tax Credits; ESI – Employer Sponsored Insurance; CHIP – Children’s Health Insurance Program; OOP – Out-of-Pocket.

Estimates and 95% confidence intervals (CI) for the unadjusted and adjusted post-ACA (2014-2017) vs pre-ACA (2000-2013) change in financial burden measures are presented by group; adjusted post vs pre change were estimated from fully adjusted multivariable models including a difference-in-differences estimator and controlling for number of children in the family, number of adults in the family, infants in the family, seniors (ages ≥65) in the family, interview language, sex of the family respondent, race/ethnicity of the family respondent, marital status of the family respondent, highest educational attainment within the family, region of residence, family members in fair/poor physical health, and family members in fair/poor mental health. The difference-in-differences estimator shows the adjusted relative change in burden for each eligibility group compared to families who were not eligible for assistance but who had ESI offered. Premiums are among families who reported any private coverage from 2001 on (N=57,442).
